# Supplementary material for: Development and In Vitro Assessment of a Novel Vacuum-Based Tissue-Holding Device for Laparoscopic and Robotic Kidney Cancer Operations
Source: MDPI journal article supplement (doi:10.3390/cancers14194618), 2022-09-23
Supplement: s1 [file s1]

## **File S1**

### **Questionnaire VAC-CAP EXPERIMENT**

Evaluation: Likert scale 1-6 (6 very good)

1. Passes VAC-CAP well through trocar: \_\_\_\_\_
2. Is the suction/adhesion to the tissue good? \_\_\_\_\_
  - Horizontal movements (sideways, forward/backward) \_\_\_\_\_
  - Vertical movements (up/down) \_\_\_\_\_
3. Are there tissue damages on the surrounding parenchyma? YES / NO
4. Are there are tissue damages on the resected parenchyma ("tumor")? YES / NO
3. Gripping surface: can the VAC-CAP be gripped well with the instrument? \_\_\_\_\_
4. Connection to standard tubing: is the connection to the tubing good? \_\_\_\_\_
5. Does the tubing interfere with the preparation? YES / NO
6. is the tube in the trocar good (only if drained through the trocar)? YES / NO
7. Can the tube be placed well through the trocar? \_\_\_\_\_
8. Tube: is the tube cause any problems in the trocar? \_\_\_\_\_
9. Did the resection work well? \_\_\_\_\_
10. Was the VAC-CAP helpful? \_\_\_\_\_
11. Is the material of the VAC-CAP intact after the procedure? \_\_\_\_\_
11. Overall impression: \_\_\_\_\_

Comment:
